# Supplementary material for: Impact of Hemoglobin Levels and Their Dynamic Changes on the Risk of Atrial Fibrillation: A Nationwide Population-Based Study
Source: PubMed Central journal article supplement (PMC7174343; doi:10.1038/s41598-020-63878-9), 2020-04-21
Supplement: 41598_2020_63878_MOESM1_ESM.pdf [file 41598_2020_63878_MOESM1_ESM.pdf]

## **Impact of Hemoglobin Levels and Their Dynamic Changes on the Risk of Atrial Fibrillation: A Nationwide Population-Based Study**

Woo-Hyun Lim, MD<sup>1</sup>, Eue-Keun Choi, MD, PhD<sup>2</sup>, Kyung-Do Han, MS<sup>3</sup>, So-Ryoung Lee, MD<sup>2</sup>, Myung-Jin Cha, MD<sup>2</sup>, Seil Oh, MD, Ph.D., FHRS<sup>2</sup>

<sup>1</sup>Division of Cardiology, Department of Internal medicine, Seoul National University Boramae Medical Center, Seoul, Republic of Korea; <sup>2</sup>Division of Cardiology, Department of Internal medicine, Seoul National University Hospital, Seoul, Republic of Korea; <sup>3</sup>Department of Biostatistics, College of Medicine, The Catholic University of Korea, Seoul, Republic of Korea;

**Running Title:** hemoglobin level and atrial fibrillation

### **Corresponding Author:**

Eue-Keun Choi, MD, PhD

Department of Internal Medicine, Seoul National University Hospital

101 Daehak-ro, Jongno-gu, Seoul, 03080, Republic of Korea

Phone +82-2-2072-0688/Fax +82-2-762-9662

E-mail: [choiek17@snu.ac.kr](mailto:choiek17@snu.ac.kr)

## Supplementary Information

### I. Supplementary Tables

**Supplementary Table 1.** Definition of comorbidities and clinical outcomes

| <b>Diagnosis</b>                             | <b>ICD-10-CM code</b>       | <b>Diagnostic definition</b>                                                                                                                                                                                                                                                                    |
|----------------------------------------------|-----------------------------|-------------------------------------------------------------------------------------------------------------------------------------------------------------------------------------------------------------------------------------------------------------------------------------------------|
| <b>Atrial fibrillation</b>                   | I480-484, I489              | Admission or outpatient department $\geq$ 1                                                                                                                                                                                                                                                     |
| <b>Valvular atrial fibrillation</b>          | I050, I052, I059, Z952-Z954 | Admission or outpatient department $\geq$ 1                                                                                                                                                                                                                                                     |
| <b>Hypertension</b>                          | I10-I13, I15                | Admission $\geq$ 1 or outpatient department $\geq$ 2<br>Minimum 1 prescription of anti-hypertensive medications (thiazide, loop diuretics, aldosterone antagonist, alpha-/beta-blocker, calcium-channel blocker, angiotensin-converting enzyme inhibitor, and angiotensin II receptor blocker). |
| <b>Diabetes mellitus</b>                     | E11-E14                     | Admission $\geq$ 1 or outpatient department $\geq$ 2<br>Minimum 1 prescription of anti-diabetic medications (sulfonylureas, metformin, meglitinides, thiazolidinediones, dipeptidyl peptidase-4 inhibitors, $\alpha$ -glucosidase inhibitors and insulin).                                      |
| <b>Dyslipidemia</b>                          | E78                         | Admission or outpatient department $\geq$ 1                                                                                                                                                                                                                                                     |
| <b>Ischemic heart disease</b>                | I20-25                      | Admission or outpatient department $\geq$ 1                                                                                                                                                                                                                                                     |
| <b>Congestive heart failure</b>              | I50                         | Admission or outpatient department $\geq$ 1                                                                                                                                                                                                                                                     |
| <b>Stroke</b>                                | I63, I64                    | Admission $\geq$ 1 and brain imaging (CT or MRI) $\geq$ 1                                                                                                                                                                                                                                       |
| <b>Chronic obstructive pulmonary disease</b> | J41-44                      | Admission or outpatient department $\geq$ 1                                                                                                                                                                                                                                                     |

**Obstructive sleep apnea**

G473

Admission or outpatient department≥1

**Thyroid disease**

Hypothyroidism

E02-E03

Admission or outpatient department≥1

Minimum 1 prescription of thyroid hormones

Hyperthyroidism

E05

Admission or outpatient department≥1

Minimum 1 prescription of antithyroid medications  
(propylthiouracil and methimazole)

---

Abbreviation: ICD-10-CM, International Classification of Diseases, Tenth Revision, Clinical Modification.

## II. Supplementary Figures

**Supplementary Figure 1.** Timeline of the study

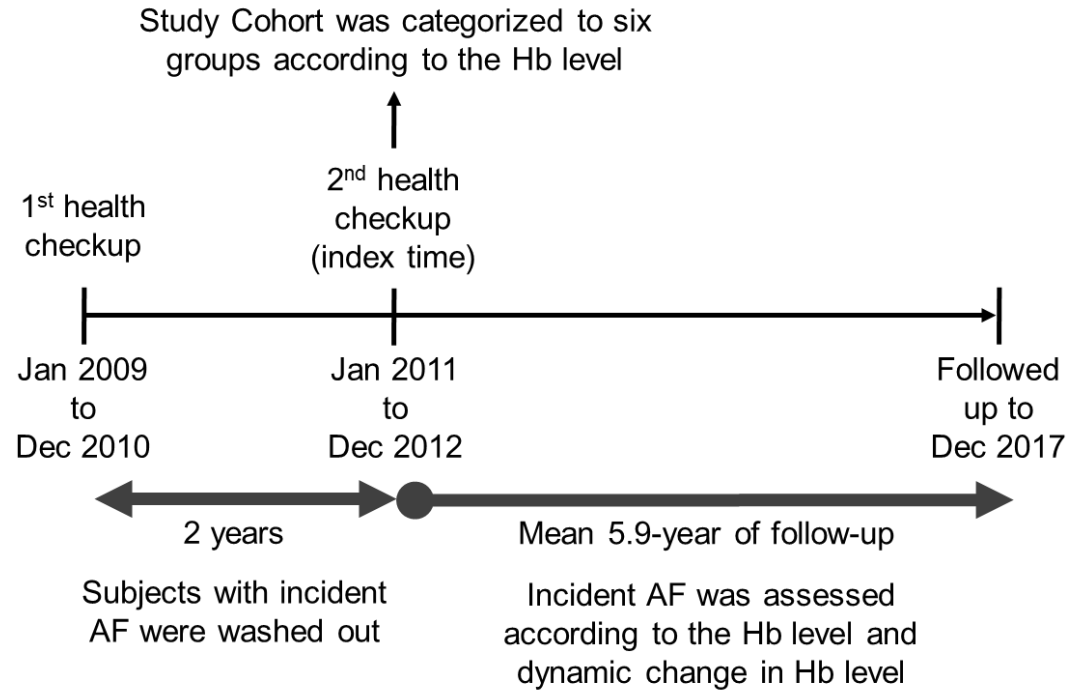

### *Dynamic change of Hb levels between 2 years*

| 1 <sup>st</sup> Hb level |   | 2 <sup>nd</sup> Hb level     |
|--------------------------|---|------------------------------|
| Anemic                   | → | Anemic, normal, upper normal |
| Normal                   | → | Anemic, normal, upper normal |
| Upper normal             | → | Anemic, normal, upper normal |

Abbreviations: AF, atrial fibrillation; Hb, hemoglobin
